# Supplementary material
Source: MDPI journal article supplement (https://www.mdpi.com/2673-4125/2/4/44)
Supplement: s1 [file s1]

## **Supplementary Information**

### **Adherent moving of polymers in spherical confined binary semiflexible ring polymer mixtures**

Xiaolin Zhou\*   Wan Wei

**S1. Calculation details of the simulation parameters in Table 1**

As there is a strong repulsive force for the distance between the monomer of the long SRP and a sphere surface less than  $d < 1$ , the value of the distance between the monomer of the long SRP and sphere center ranges for  $d$  is  $d = 0-19$ . The number of total monomers  $N_{\text{total}}$  is

$$N_{\text{total}} = \rho * V = (L_{\text{long}} * N_{\text{long}} + L_{\text{short}} * N_{\text{short}}) = 0.5\sigma^{-3} * (4 * \pi * 19\sigma^3 / 3) \approx 14365$$

Additionally, the length of the short ring in the bulk involved in this article is in the range of  $L_{\text{short}} = 5-40$ , and the corresponding number of short rings  $N_{\text{short}}$  can be calculated. The result of  $N_{\text{short}}$  is taken as an integer:

$$\therefore N_{\text{short}} = (N_{\text{total}} - L_{\text{long}} * N_{\text{long}}) / L_{\text{short}}$$

$$\text{For } L_{\text{short}} = 5, \quad N_{\text{short}} = (N_{\text{total}} - L_{\text{long}} * N_{\text{long}}) / L_{\text{short}} = (14365 - 50) / 5 = 2863$$

$$\text{For } L_{\text{short}} = 10, \quad N_{\text{short}} = (N_{\text{total}} - L_{\text{long}} * N_{\text{long}}) / L_{\text{short}} = (14365 - 50) / 10 = 1431.5 \approx 1432$$

$$\text{For } L_{\text{short}} = 20, \quad N_{\text{short}} = (N_{\text{total}} - L_{\text{long}} * N_{\text{long}}) / L_{\text{short}} = (14365 - 50) / 20 = 715.75 \approx 716$$

$$\text{For } L_{\text{short}} = 30, \quad N_{\text{short}} = (N_{\text{total}} - L_{\text{long}} * N_{\text{long}}) / L_{\text{short}} = (14365 - 50) / 30 = 477.16 \approx 477$$

$$\text{For } L_{\text{short}} = 40, \quad N_{\text{short}} = (N_{\text{total}} - L_{\text{long}} * N_{\text{long}}) / L_{\text{short}} = (14365 - 50) / 40 = 357.86 \approx 358$$
